# Supplementary material
Source: Springer Nature journal article supplement (https://www.springermedizin.de/resource/supplementary/12889_2011_3356_MOESM4_ESM.pdf/9488686)
Supplement: MOESM4 [file 9488686]

#### **FIGURE 4: SPECIFIC SUGGESTIONS ON FOLLOW-UP AFTER ICMT**

- “Must be seen as part of IMCI training”
- “Very important for strengthening practical skills and establishing technical support”
- “Emphasise and plan follow-up before a course is planned”
- “Link with ongoing supervision / Aim for integrated follow-up and supervision / Supervisors need to strengthen this”
